# Supplementary material for: A substituentpara-to-orthopositioning effect drives the photoreactivity of a dibenzothiophene-based oxalate series used as LED-excitable free radical photoinitiators
Source: Royal Society of Chemistry journal article supplement (doi:10.1039/c9py00052f), 2019-01-01
Supplement: c9py00052f1.pdf [file c9py00052f1.pdf]

Electronic supporting information

## **Substituents para-to-ortho positioning effect driving the photoreactivity of a dibenzothiophene-based oxalate series used as LEDs excitable free radical photoinitiators**

Haiyan Pan,<sup>1</sup> Siqi Chen,<sup>1</sup> Ming Jin\*,<sup>1</sup> Jean-Pierre Malval\*,<sup>2</sup> Decheng Wan,<sup>1</sup> Fabrice Morlet-Savary<sup>2</sup>

<sup>1</sup>*Department of Polymer Materials, School of Materials Science and Engineering, Tongji University, 4800 Caoan Road, Shanghai, 201804, P.R. China*

<sup>2</sup>*Institute de Science des Matériaux de Mulhouse, UMR CNRS 7361, Université de Haute-Alsace, 15 rue Jean Starcky, Mulhouse, 68057, France*

Correspondence to:

M. Jin (e-mail: [mingjin@tongji.edu.cn](mailto:mingjin@tongji.edu.cn)), J.P. Malval (e-mail: [jean-pierre.malval@uha.fr](mailto:jean-pierre.malval@uha.fr))

### **Contents**

**Figure S1.** The <sup>1</sup>H NMR spectra of four compounds in CDCl<sub>3</sub>.

**Figure S2.** The <sup>13</sup>C NMR spectra of four compounds in CDCl<sub>3</sub>.

**Figure S3.** The Mass spectra of HO and HP.

**Figure S4.** The Mass spectra of BO and BP.

**Table S1.** hfc (hyperfine coupling constants) for the detected spin adduct of PBN in toluene.

**Table S2.** Complete photopolymerization results using distinctive LEDs sources and upon irradiance in the 30-80 mW cm<sup>-2</sup> range.

8.82 (s, 1H),  
 8.24 (dd,  $J = 6.2, 2.6$  Hz, 1H),  
 8.09 (dd,  $J = 8.4, 1.7$  Hz, 1H),  
 7.95 (d,  $J = 8.4$  Hz, 1H),  
 7.91 – 7.84 (m, 1H),  
 7.56 – 7.48 (td/td, 2H),  
 4.04 (s,  $J = 5.0$  Hz, 3H).

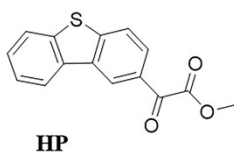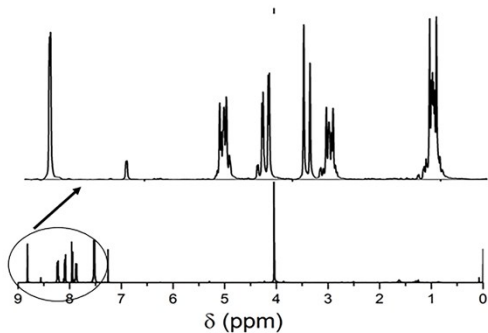

(a)  $^1\text{H}$  NMR spectra of HP in  $\text{CDCl}_3$

8.44 (dd,  $J = 7.8, 1.0$  Hz, 1H),  
 8.29 – 8.12 (dd/dd, 2H),  
 8.04 – 7.90 (dd, 1H),  
 7.60 (t,  $J = 7.7$  Hz, 1H),  
 7.56 – 7.48 (t/t, 2H),  
 4.05 (s, 3H).

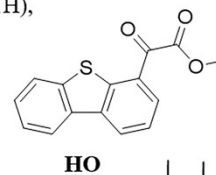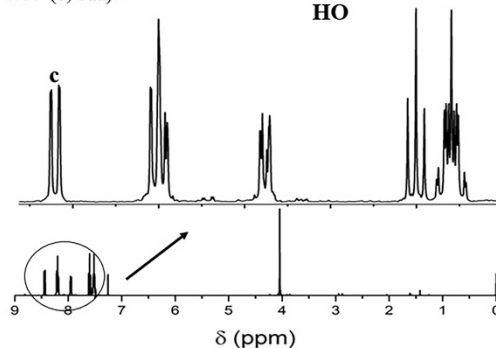

(b)  $^1\text{H}$  NMR spectra of HO in  $\text{CDCl}_3$

c: 8.74 (s, 1H),  
 d: 8.32 (s, 1H),  
 a: 8.08 (dd,  $J = 8.5, 1.6$  Hz, 1H),  
 f: 7.90 (d,  $J = 8.5$  Hz, 1H),  
 e: 7.68 (d,  $J = 8.5$  Hz, 1H),  
 b: 7.57 (dd,  $J = 8.6, 1.9$  Hz, 1H),  
 g: 3.98 (d, 3H).

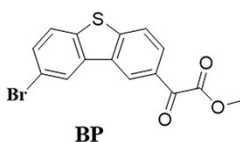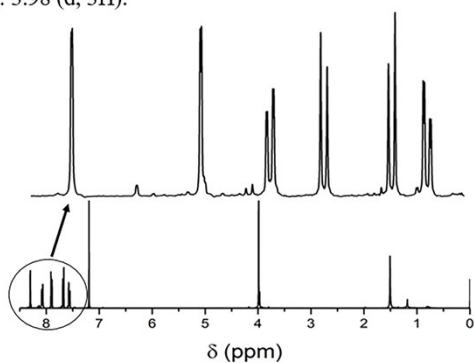

(c)  $^1\text{H}$  NMR spectra of BP in  $\text{CDCl}_3$

c: 8.34 (dd,  $J = 10.9, 5.4$  Hz, 1H),  
 d: 8.25 (s, 1H),  
 a: 8.21 (dd,  $J = 7.7, 1.0$  Hz, 1H),  
 f: 7.76 (d,  $J = 8.5$  Hz, 1H),  
 b/e: 7.64 – 7.50 (t/d, 2H),  
 g: 3.99 (d,  $J = 4.6$  Hz, 3H).

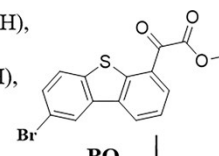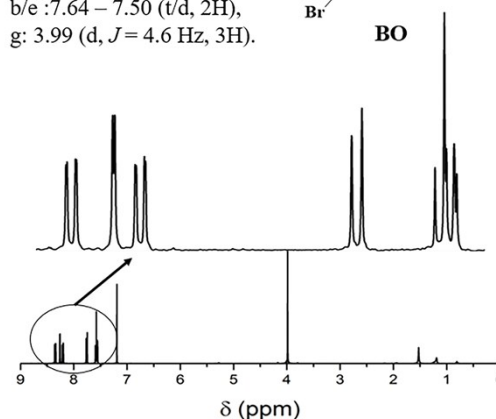

(d)  $^1\text{H}$  NMR spectra of BO in  $\text{CDCl}_3$

**Figure S1.** The  $^1\text{H}$  NMR spectra of four compounds in  $\text{CDCl}_3$ .

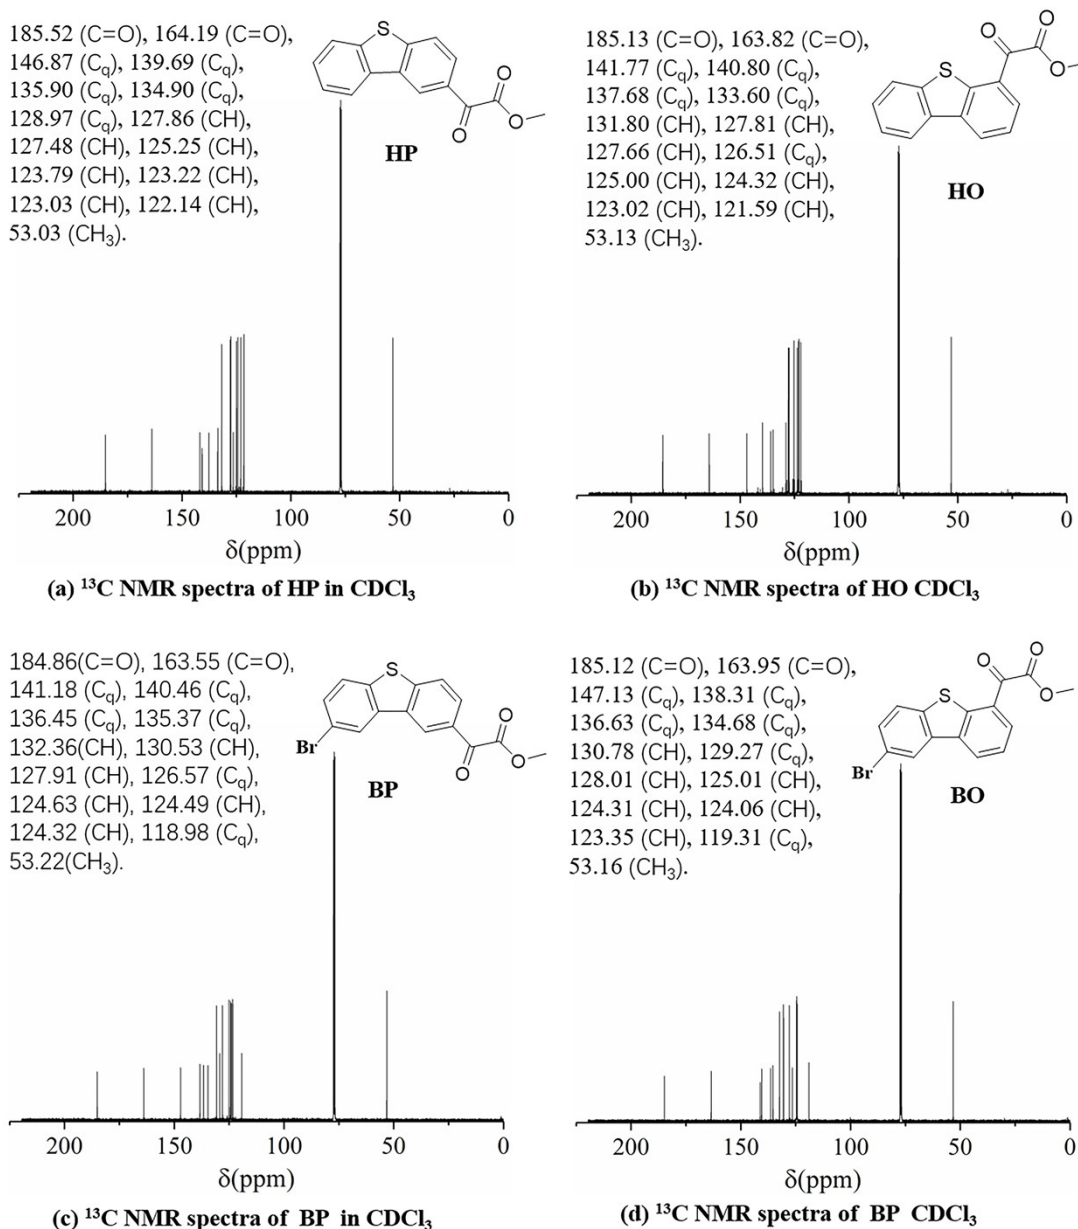

**Figure S2.** The <sup>13</sup>C NMR spectra of four compounds in CDCl<sub>3</sub>.

**HP.** <sup>1</sup>H NMR (CDCl<sub>3</sub>) δ (ppm): 8.82 (s, 1H), 8.24 (dd, J = 6.2, 2.6 Hz, 1H), 8.09 (dd, J = 6.2, 2.6 Hz, 1H), 7.95 (d, J = 8.4 Hz 1H), 7.91–7.84 (m, 1H), 7.56–7.48 (td/td, 2H), 4.04 (s, J = 8.4 Hz, 3H). <sup>13</sup>C NMR (CDCl<sub>3</sub>) δ (ppm): 185.52 (C=O), 164.19 (C=O), 146.87 (C<sub>q</sub>), 139.69 (C<sub>q</sub>), 135.90 (C<sub>q</sub>), 134.90 (C<sub>q</sub>), 128.97 (C<sub>q</sub>), 127.86 (CH), 127.48 (CH), 125.25 (CH), 123.79 (CH), 123.22 (CH), 123.03 (CH), 122.14 (CH), 53.03 (CH<sub>3</sub>). HRMS (TOF MS ESI): m/z 293.0247 (M + Na<sup>+</sup>) (Calcd: 270.0351).

**HO.**  $^1\text{H}$  NMR ( $\text{CDCl}_3$ )  $\delta$  (ppm): 8.44 (dd,  $J = 7.8, 1.0$  Hz, 1H), 8.29–8.12 (dd/dd, 2H), 8.04–7.90 (dd, 1H), 7.60 (t,  $J = 7.7$  Hz, 1H), 7.56–7.48 (t/t, 2H), 4.05 (s, 3H).  $^{13}\text{C}$  NMR ( $\text{CDCl}_3$ )  $\delta$  (ppm): 185.13 (C=O), 163.82 (C=O), 141.77 ( $\text{C}_q$ ), 140.80 ( $\text{C}_q$ ), 137.68 ( $\text{C}_q$ ), 133.60 ( $\text{C}_q$ ), 131.80 (CH), 127.81 (CH), 127.66 (CH), 126.51 ( $\text{C}_q$ ), 125.00 (CH), 124.32 (CH), 123.02 (CH), 121.59 (CH), 53.13 ( $\text{CH}_3$ ). HRMS (TOF MS ESI):  $m/z$  293.0247 ( $\text{M} + \text{Na}^+$ ) (Calcd: 270.0351).

**BP.**  $^1\text{H}$  NMR ( $\text{CDCl}_3$ )  $\delta$  (ppm): 8.74 (s, 1H), 8.32 (s, 1H), 8.08 (dd,  $J = 8.5, 1.6$  Hz, 1H), 7.90 (d,  $J = 8.5$  Hz, 1H), 7.68 (d,  $J = 8.5$  Hz, 1H), 7.57 (dd,  $J = 8.6, 1.9$  Hz, 1H), 3.98 (d, 3H).  $^{13}\text{C}$  NMR ( $\text{CDCl}_3$ )  $\delta$  (ppm): 184.86(C=O), 163.55 (C=O), 141.18 ( $\text{C}_q$ ), 140.46 ( $\text{C}_q$ ), 136.45 ( $\text{C}_q$ ), 135.37 ( $\text{C}_q$ ), 132.36(CH), 130.53 (CH), 127.91 (CH), 126.57 ( $\text{C}_q$ ), 124.63 (CH), 124.49 (CH), 124.32 (CH), 118.98 ( $\text{C}_q$ ), 53.22( $\text{CH}_3$ ). HRMS (TOF MS ESI):  $m/z$  370.9355 ( $\text{M} + \text{Na}^+$ ) (Calcd: 347.9456).

**BO.**  $^1\text{H}$  NMR ( $\text{CDCl}_3$ )  $\delta$  (ppm): 8.34 (dd,  $J = 10.9, 5.4$  Hz, 1H), 8.25 (s, 1H), 8.21 (dd,  $J = 7.7, 1.0$  Hz, 1H), 7.76 (d,  $J = 8.5$  Hz, 1H), 7.64 – 7.50 (t/d, 2H), 3.99 (d,  $J = 4.6$  Hz, 3H).  $^{13}\text{C}$  NMR ( $\text{CDCl}_3$ )  $\delta$  (ppm): 185.12 (C=O), 163.95 (C=O), 147.13 ( $\text{C}_q$ ), 138.31 ( $\text{C}_q$ ), 136.63 ( $\text{C}_q$ ), 134.68 ( $\text{C}_q$ ), 130.78 (CH), 129.27 ( $\text{C}_q$ ), 128.01 (CH), 125.01 (CH), 124.31 (CH), 124.06 (CH), 123.35 (CH), 119.31 ( $\text{C}_q$ ), 53.16 ( $\text{CH}_3$ ). HRMS (TOF MS ESI):  $m/z$  386.0710 ( $\text{M} + \text{K}^+$ ) (Calcd: 347.9456).

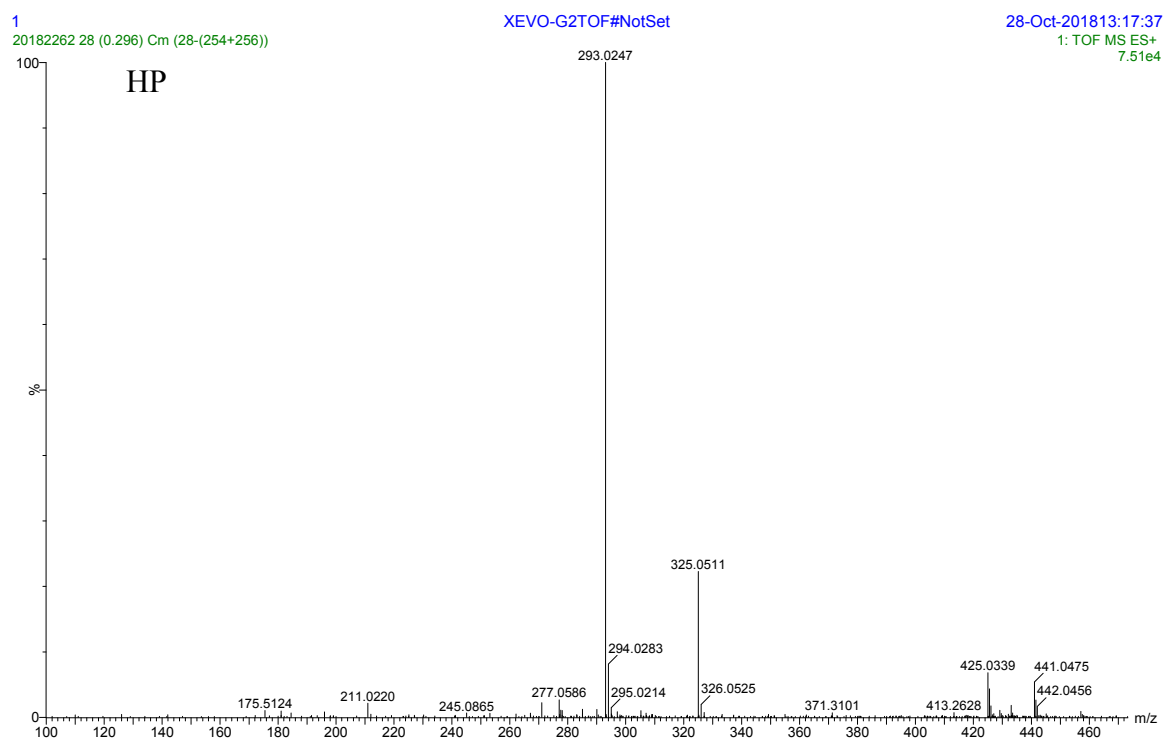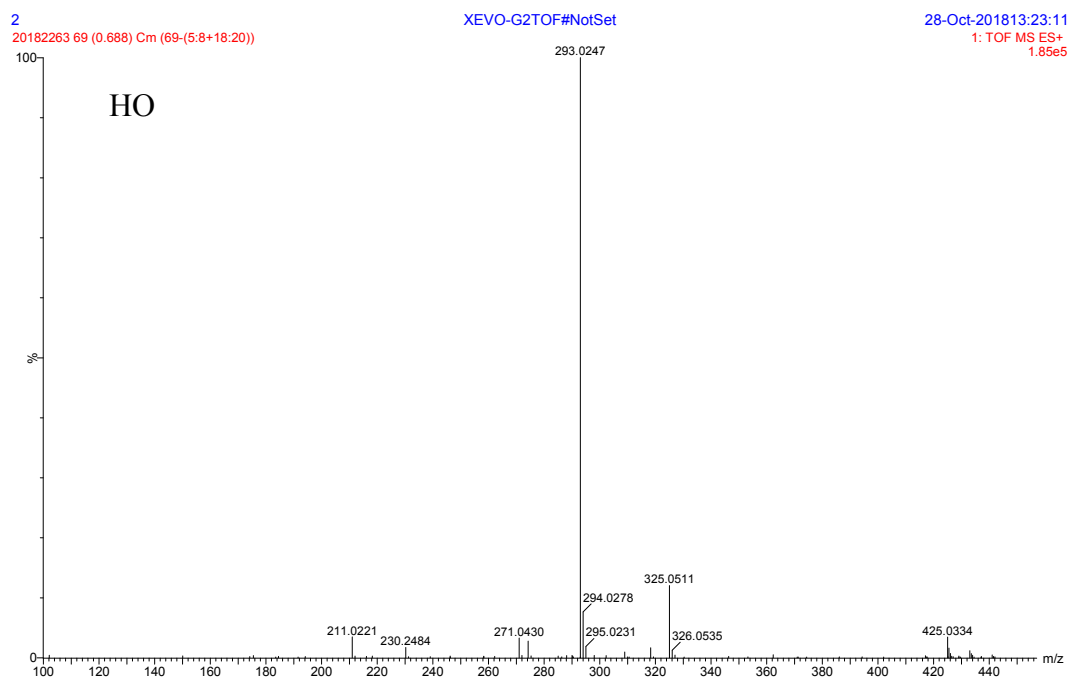

Figure S3. The Mass spectra of HO and HP.

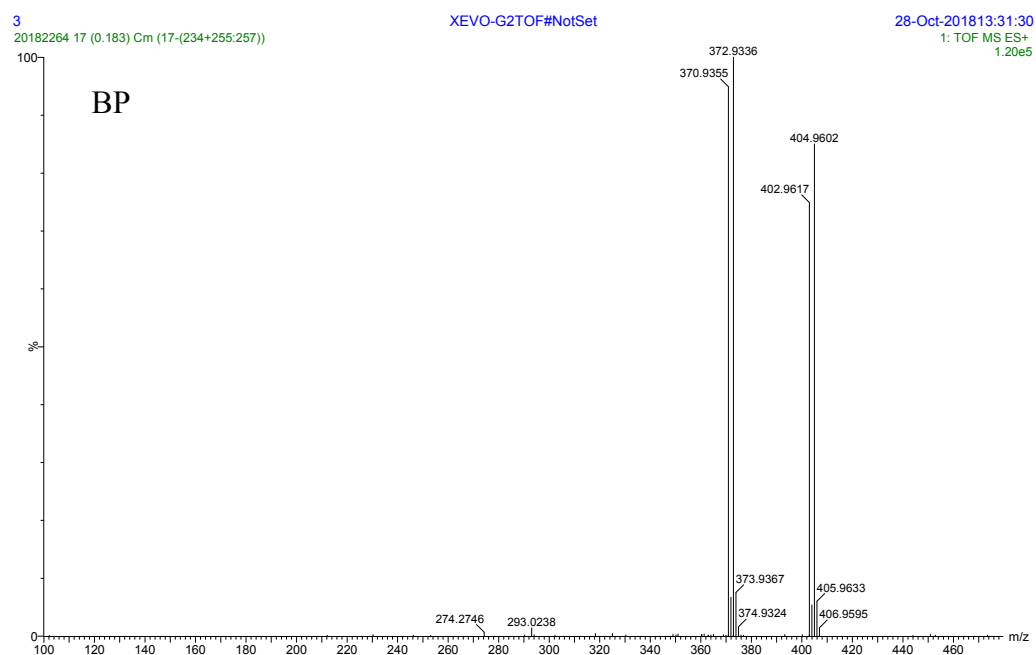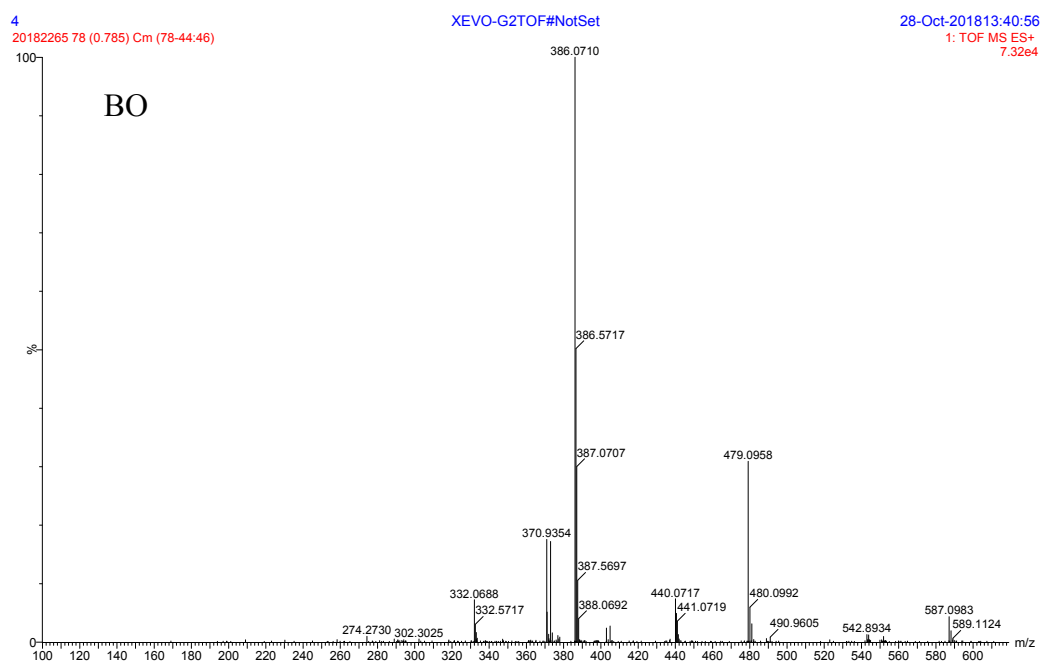

Figure S4. The Mass spectra of BO and BP.

**Table S1.** hfc (hyperfine coupling constants) for the detected spin adduct of PBN in

| <b>PIs</b> | <b>Radical 1</b>                                          | <b>Radical 2</b>                                          | <b>PBN<sub>ox</sub></b> |
|------------|-----------------------------------------------------------|-----------------------------------------------------------|-------------------------|
| <b>HP</b>  | $a_N = 13.5 \text{ G} ; a_H = 1.8 \text{ G} ;$<br>(53.3%) | $a_N = 14.0 \text{ G} ; a_H = 5.1 \text{ G} ;$<br>(44.3%) | (3.4%)                  |
| <b>HO</b>  | $a_N = 13.5 \text{ G} ; a_H = 1.8 \text{ G} ;$<br>(56.2%) | $a_N = 14.0 \text{ G} ; a_H = 5.1 \text{ G} ;$<br>(42.0%) | (1.8%)                  |
| <b>BP</b>  | $a_N = 13.6 \text{ G} ; a_H = 1.8 \text{ G} ;$<br>(47.8%) | $a_N = 14.0 \text{ G} ; a_H = 5.1 \text{ G} ;$<br>(50.2%) | (2.0%)                  |
| <b>BO</b>  | $a_N = 13.6 \text{ G} ; a_H = 1.8 \text{ G} ;$<br>(59.3%) | $a_N = 14.0 \text{ G} ; a_H = 5.1 \text{ G} ;$<br>(39.2%) | (1.5%)                  |

toluene of four PIs.

**Table S2.** Complete photopolymerization results using distinctive LEDs sources and upon irradiance in the 30-80 mW cm<sup>-2</sup> range

| Monomer      | LEDs<br>( $\lambda_{irr}$ ) / (mW·cm <sup>-2</sup> ) | Photoinitiator | concentration<br>of<br>Photoinitiator | R <sub>p</sub> /<br>[M]<br>s <sup>-1</sup> | Conversion<br>at t = 60 s<br>(%) |
|--------------|------------------------------------------------------|----------------|---------------------------------------|--------------------------------------------|----------------------------------|
| <b>TPGDA</b> |                                                      | <b>HP</b>      | 3 wt%                                 | 26                                         | 92                               |
|              |                                                      | <b>HO</b>      |                                       | 11                                         | 91                               |
|              |                                                      | <b>BP</b>      |                                       | 30                                         | 93                               |
|              |                                                      | <b>BO</b>      |                                       | 22                                         | 95                               |
| <b>TMPTA</b> | 365/27                                               | <b>HP</b>      | 1 wt%                                 | 5.6                                        | 41                               |
|              |                                                      | <b>HO</b>      |                                       | 3.7                                        | 43                               |
|              |                                                      | <b>BP</b>      |                                       | 4.4                                        | 40                               |
|              |                                                      | <b>BO</b>      |                                       | 3.2                                        | 51                               |
| <b>HDDA</b>  |                                                      | <b>HP</b>      | 1 wt%                                 | 9.3                                        | 85                               |
|              |                                                      | <b>HO</b>      |                                       | 4.3                                        | 82                               |
|              |                                                      | <b>BP</b>      |                                       | 6.9                                        | 78                               |
|              |                                                      | <b>BO</b>      |                                       | 4.1                                        | 70                               |
| <b>TPGDA</b> |                                                      | <b>HP</b>      | 3 wt%                                 | 24                                         | 92                               |
|              |                                                      | <b>HO</b>      |                                       | 16                                         | 92                               |
|              |                                                      | <b>BP</b>      |                                       | 25                                         | 94                               |
|              |                                                      | <b>BO</b>      |                                       | 20                                         | 95                               |
| <b>TMPTA</b> | 385/48                                               | <b>HP</b>      | 1 wt%                                 | 5.3                                        | 44                               |
|              |                                                      | <b>HO</b>      |                                       | 4.6                                        | 48                               |
|              |                                                      | <b>BP</b>      |                                       | 3.6                                        | 36                               |
|              |                                                      | <b>BO</b>      |                                       | 4.2                                        | 41                               |
| <b>HDDA</b>  |                                                      | <b>HP</b>      | 1 wt%                                 | 6.5                                        | 83                               |
|              |                                                      | <b>HO</b>      |                                       | 3.5                                        | 82                               |
|              |                                                      | <b>BP</b>      |                                       | 5.7                                        | 82                               |
|              |                                                      | <b>BO</b>      |                                       | 3.5                                        | 76                               |
| <b>TPGDA</b> |                                                      | <b>HP</b>      | 3 wt%                                 | 25                                         | 89                               |
|              |                                                      | <b>HO</b>      |                                       | 25                                         | 89                               |
|              |                                                      | <b>BP</b>      |                                       | 24                                         | 87                               |
|              |                                                      | <b>BO</b>      |                                       | 24                                         | 90                               |
| <b>TMPTA</b> | 405/77                                               | <b>HP</b>      | 1 wt%                                 | 1.5                                        | 31                               |
|              |                                                      | <b>HO</b>      |                                       | 3.1                                        | 46                               |
|              |                                                      | <b>BP</b>      |                                       | 1.5                                        | 34                               |
|              |                                                      | <b>BO</b>      |                                       | 2.2                                        | 32                               |
| <b>HDDA</b>  |                                                      | <b>HP</b>      | 1 wt%                                 | 1.0                                        | 59                               |
|              |                                                      | <b>HO</b>      |                                       | 1.7                                        | 79                               |
|              |                                                      | <b>BP</b>      |                                       | 1.2                                        | 62                               |
|              |                                                      | <b>BO</b>      |                                       | 2.4                                        | 70                               |
| <b>TPGDA</b> |                                                      | <b>HP</b>      | 3 wt%                                 | 6.7                                        | 88                               |
|              |                                                      | <b>HO</b>      |                                       | 9.2                                        | 88                               |
|              |                                                      | <b>BP</b>      |                                       | 5.4                                        | 82                               |
|              |                                                      | <b>BO</b>      |                                       | 6.5                                        | 86                               |
| <b>TMPTA</b> | 425/37                                               | <b>HP</b>      | 1 wt%                                 | 0.1                                        | 17                               |
|              |                                                      | <b>HO</b>      |                                       | 0.5                                        | 28                               |
|              |                                                      | <b>BP</b>      |                                       | 0.04                                       | 14                               |
|              |                                                      | <b>BO</b>      |                                       | 0.1                                        | 20                               |
| <b>HDDA</b>  |                                                      | <b>HP</b>      | 1 wt%                                 | 0.5                                        | 46                               |
|              |                                                      | <b>HO</b>      |                                       | 0.7                                        | 66                               |
|              |                                                      | <b>BP</b>      |                                       | 0.8                                        | 41                               |
|              |                                                      | <b>BO</b>      |                                       | 0.9                                        | 70                               |
